# Supplementary material
Source: PubMed Central journal article supplement (PMC4050167)
Supplement: cc-13-1617-s01.pdf [file cc-13-1617-s01.pdf]

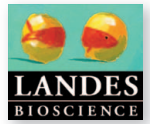

## **Supplemental Material to:**

**Tatiana Guevara, Mónica Sancho, Enrique Pérez-Payá,  
and Mar Orzáez**

**Role of CDK5/cyclin complexes in ischemia-induced death  
and survival of renal tubular cells**

**Cell Cycle 2014; 13(10)**

**<http://dx.doi.org/10.4161/cc.28628>**

**<http://www.landesbioscience.com/journals/cc/article/28628>**

# Supplementary

## Figure S1

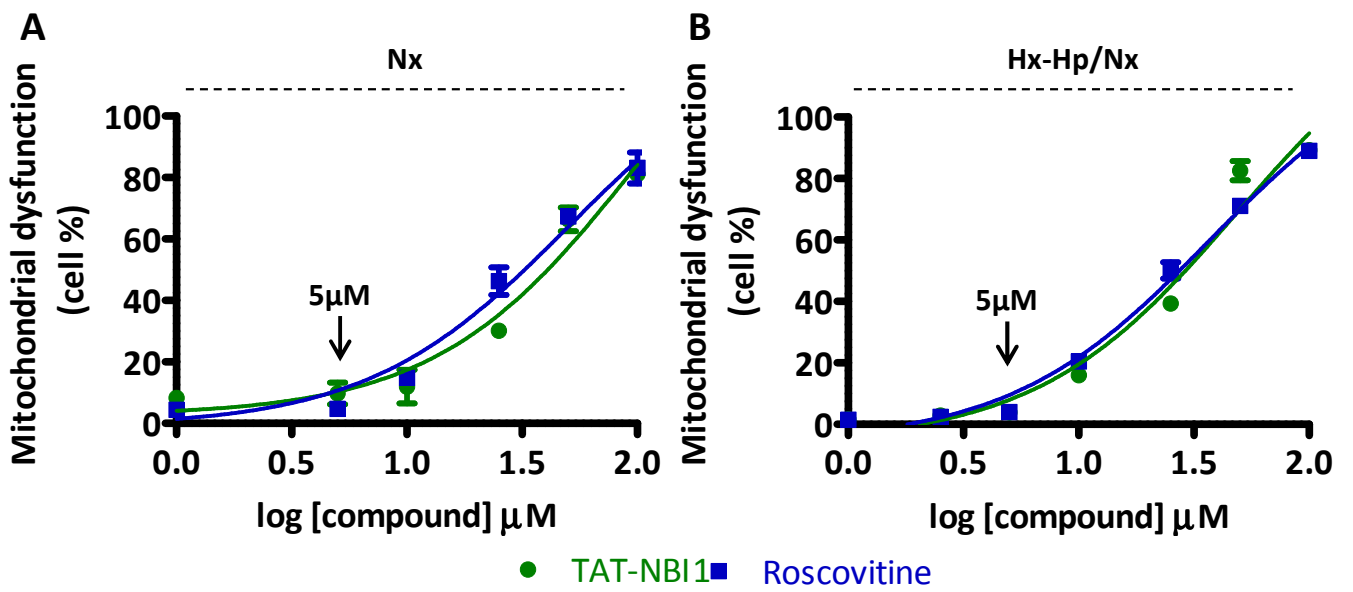

**Table S1. TAT-NBI1 inhibition of different CDK/cyclin complexes.**

| <b>Kinase</b>    | <b>IC<sub>50</sub> (μM)</b> |
|------------------|-----------------------------|
| CDK2/cyclin A    | 1                           |
| CDK1/cyclin B1   | 2                           |
| CDK5/ p35        | 7                           |
| CDK6/cyclin D3** | 6                           |
| CDK7/cyclin H    | 1                           |
| CDK9/cyclin T1   | 50                          |
| CDK2/cyclin E    | 51                          |

Kinase assays were either described in (Canela et al, 2006) or performed by Cerep.\*\* as shown in the Calbiochem catalogue ref. 238807

## **SUPPLEMENTARY INFORMATION**

**Figure S1.** The cytotoxic effect of TAT-NBI1 and roscovitine on LLC-PK1 cells. The mitochondrial dysfunction of the LLC-PK1 cells treated with either TAT-NBI1 or roscovitine for 24 h under Nx (panel A) or Hx-Hp/Nx conditions (panel B). The data for three independent experiments were adjusted to variable slope sigmoidal dose response curves using the Graph Pad 3.0 software.
